# Supplementary material for: Coating small-diameter ePTFE vascular grafts with tunable poly(diol-co-citrate-co-ascorbate) elastomers to reduce neointimal hyperplasia
Source: Royal Society of Chemistry journal article supplement (doi:10.1039/d1bm00101a), 2021-01-01
Supplement: d1bm00101a1.pdf [file d1bm00101a1.pdf]

## Supplementary Information

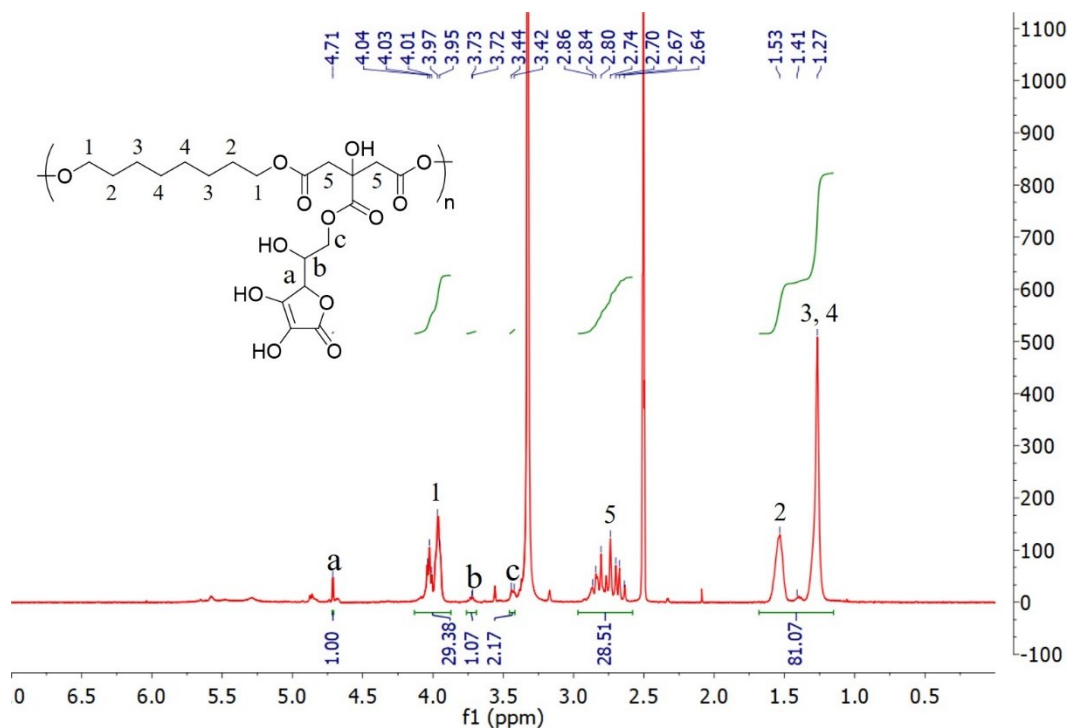

**Figure S1.** NMR spectra of POCA prepolymer (@20:20:8, [citrate]:[diol]:[ascorbate]).

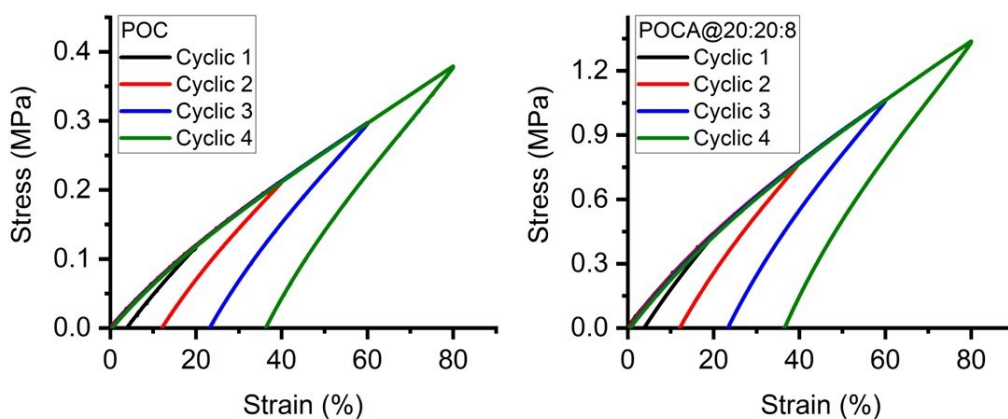

**Figure S2.** Cyclic tensile tests of dumbbell-shaped POC and POCA (@20:20:8, [citrate]:[diol]:[ascorbate]) (12 mm × 2 mm wide) at different strain conditions (20%, 40%, 60%, and 80%) show expected elastic behavior.

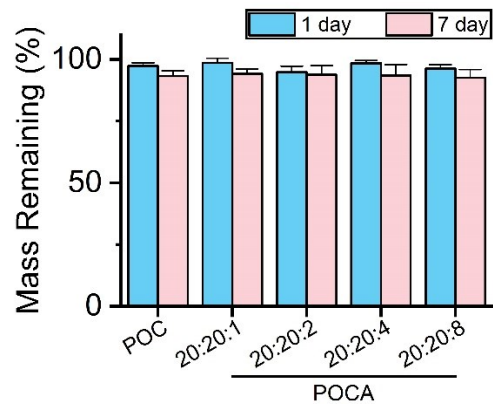

**Figure S3.** To verify elastomers were cross-linked, POC and POCA elastomers (@20:20:1, 20:20:2, 20:20:4, and 20:20:8) were assessed for mass loss in ethanol for 1 week.

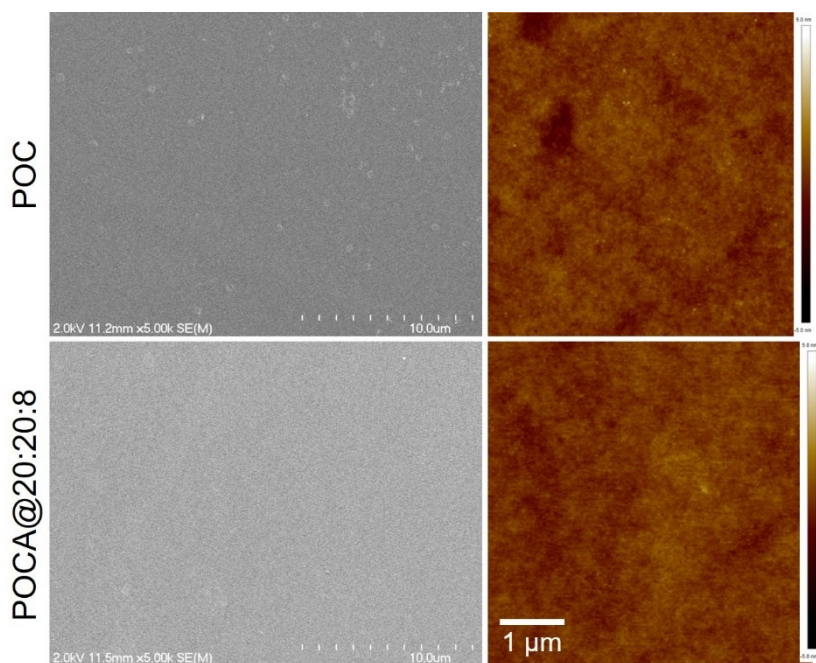

**Figure S4.** Comparison of POC and POCA elastomer (@20:20:8, [citrate]:[diol]:[ascorbate]) surface micromorphology by SEM and AFM (AFM vertical scale bar is -5 to +5 nm).

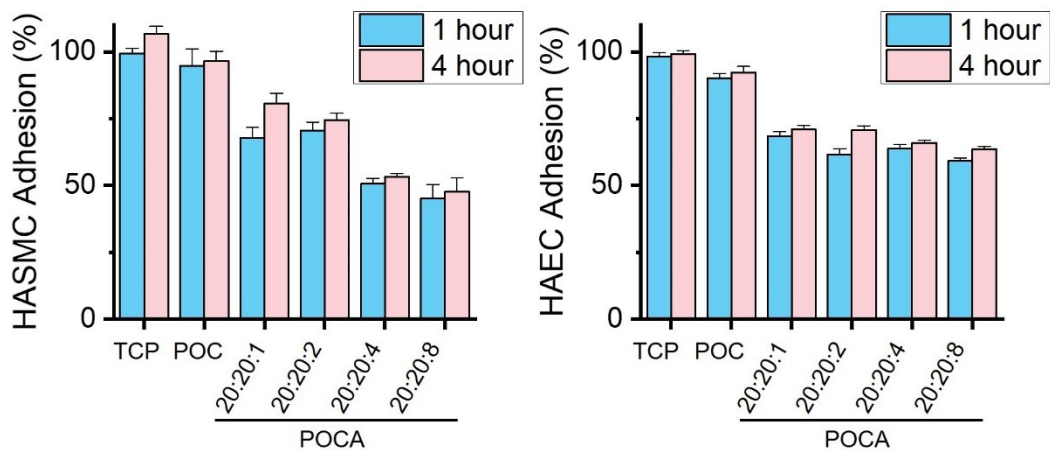

**Figure S5.** HASMC and HAEC adhesion at 1 and 4 hours on surfaces of different POCA elastomers.

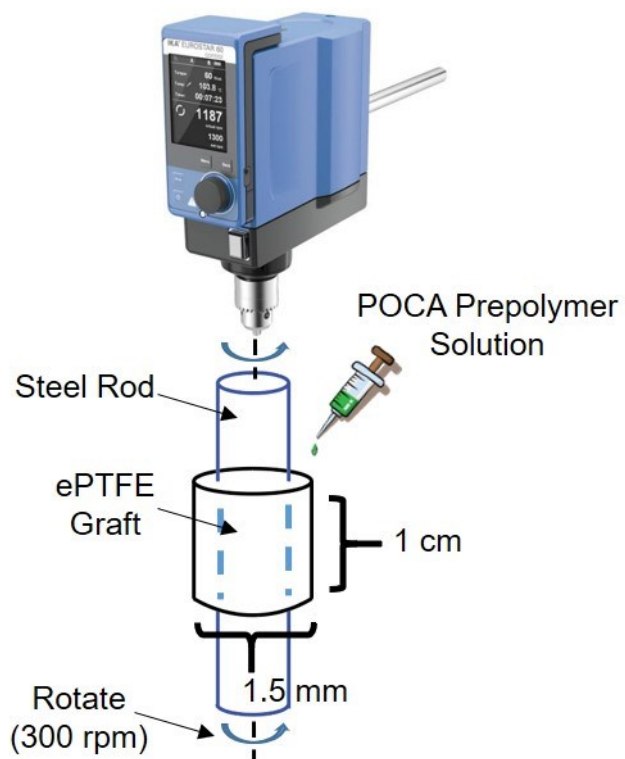

**Figure S6.** A modified spin-coating method for small-diameter ePTFE grafts.

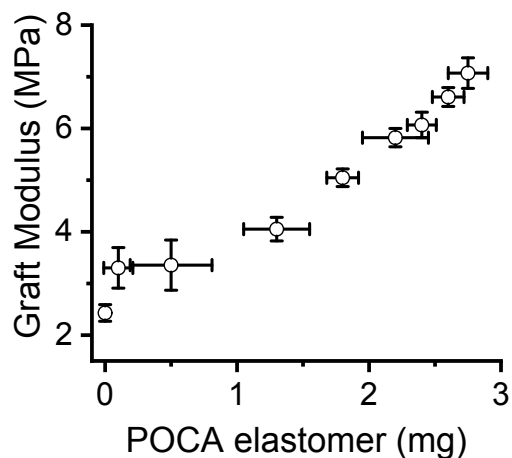

**Figure S7.** Graft modulus alteration as a function of POCA elastomer (@20:20:8, [citrate]:[diol]:[ascorbate]) mass coated on 2 cm ePTFE graft.

**Table S1.** Mole-feeding ratio of citrate, diol, and ascorbate influence POCA elastomer.

| # | AA Protected? | [Citrate]:[Diol] | Maximum [AA] | Critical point [COOH]:[OH] | Prepolymer Available | Elastomer Available |
|---|---------------|------------------|--------------|----------------------------|----------------------|---------------------|
| 1 | No            | 20:20            | 4            |                            |                      | Yes                 |
| 2 | Yes           | 20:16            | 12           | 15:19                      | Yes                  | No                  |
| 3 | Yes           | 20:20            | 8            |                            |                      | Yes                 |

Critical Point of [COOH]: [OH] mole ratio was calculated using citrate, diol with ascorbate, or benzyl-protected ascorbate.

**Table S2.** Dimensions and mechanical properties of implanted uncoated ePTFE, POC-ePTFE, and POCA-ePTFE grafts.

| Graft          | Outer diameter (mm) | Inner diameter (mm) | Wall thickness (mm) | Young's Modulus (MPa) |
|----------------|---------------------|---------------------|---------------------|-----------------------|
| Uncoated ePTFE | 1.85 ± 0.02         | 1.53 ± 0.05         | 0.15 ± 0.03         | 2.42 ± 0.16           |
| POC-ePTFE      | 1.89 ± 0.05         | 1.45 ± 0.06         | 0.18 ± 0.05         | 4.11 ± 1.22           |
| POCA-ePTFE     | 1.91 ± 0.05         | 1.46 ± 0.05         | 0.19 ± 0.06         | 4.15 ± 1.52           |

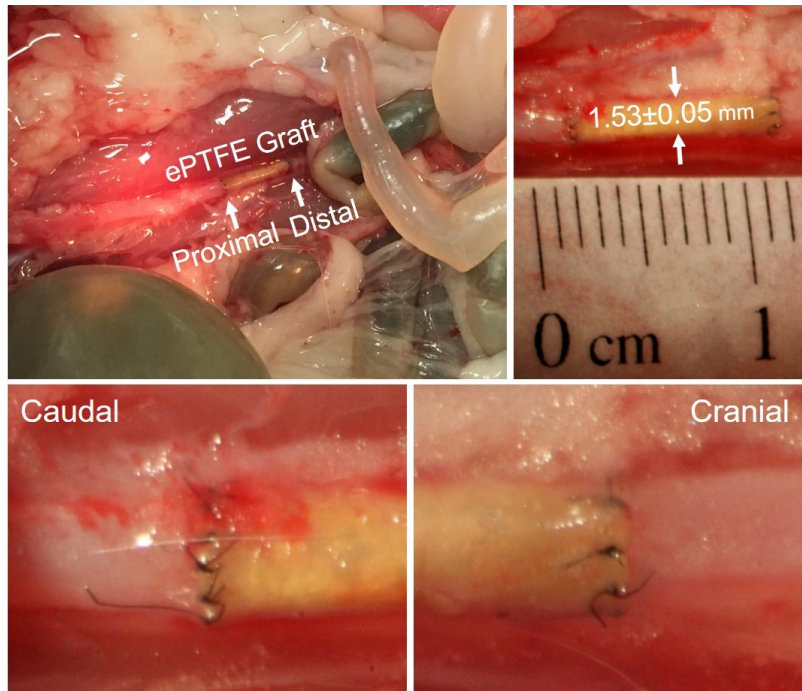

**Figure S8.** Representative image of a POCA-ePTFE graft implanted in a female guinea pig using an end-to-end anastomotic technique.
